# Supplementary material
Source: Research Square preprint supplement (doi:10.21203/rs.3.rs-9379697/v1)
Supplement: Supplementary file 1 [file 644aa8eef9145ab03f23a861.pdf]

## Supplementary material

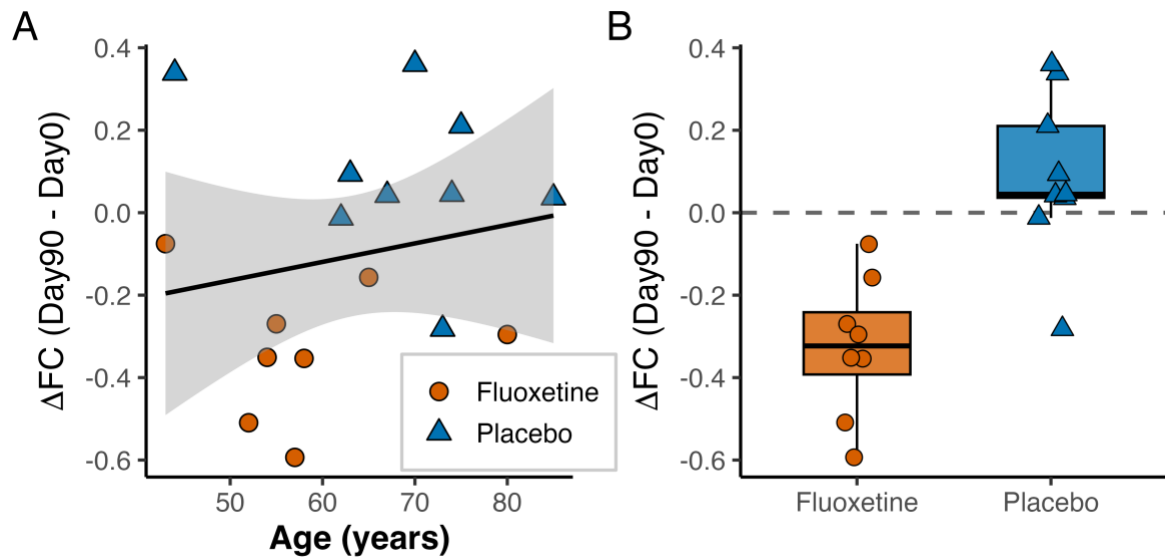

**Supplementary Fig. 1 Relationship between age and rsFC change ( $\Delta FC = \text{Day90} - \text{Day0}$ )** (A) shows individual  $\Delta FC$  values as a function of age in the fluoxetine and placebo groups. The black line indicates the global linear fit across all participants ( $r = 0.19$ ,  $P = 0.46$ ). (B) highlights the distribution of  $\Delta FC$  values by group. The dashed horizontal line indicates no change in rsFC ( $\Delta FC = 0$ ).

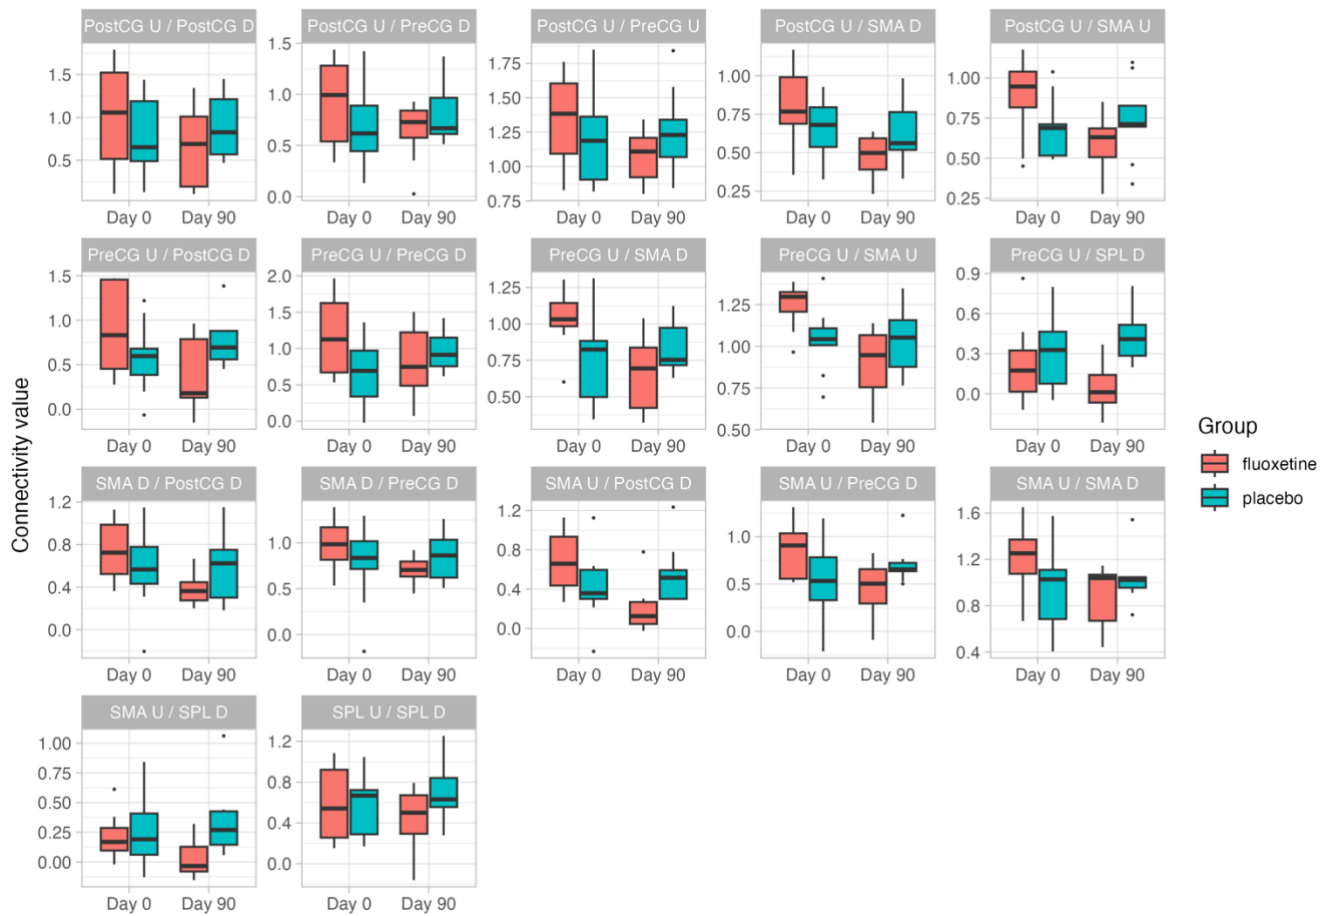

**Supplementary Fig. 2 Median connectivity value for each connection between the ROIs composing the cluster at Days 0 and 90**

D = damaged hemisphere; U = undamaged hemisphere; SMA = juxtapositional lobule cortex; PreCG = Precentral gyrus; PostCG = postcentral gyrus; SPL = superior parietal lobule.

**Supplementary Table 1 Adverse events in the 24 participants receiving one of the study treatments**

|                                   | <b>Fluoxetine<br/>(n = 22)</b> | <b>Placebo<br/>(n = 25)</b> | <b>Overall<br/>(n = 47)</b> |
|-----------------------------------|--------------------------------|-----------------------------|-----------------------------|
| Infection (n, %)                  | 3 (13.6)                       | 7 (28.0)                    | 10 (21.3)                   |
| Constipation (n, %)               | 4 (18.2)                       | 5 (20.0)                    | 9 (19.6)                    |
| Psychiatric disorders (n, %)      | 2 (09.1)                       | 5 (20.0)                    | 7 (14.9)                    |
| Gastrointestinal ailment (n, %)   | 1 (04.6)                       | 4 (16.0)                    | 5 (10.6)                    |
| Pain (n, %)                       | 3 (13.6)                       | 1 (04.0)                    | 4 (08.5)                    |
| Cytopenia (n, %)                  | 2 (09.1)                       | 0 (00.0)                    | 2 (04.3)                    |
| Dysuria (n, %)                    | 1 (04.6)                       | 1 (04.0)                    | 2 (04.3)                    |
| Algoneurodystrophy (n, %)         | 1 (04.6)                       | 0 (00.0)                    | 1 (02.1)                    |
| Coma (n, %)                       | 0 (00.0)                       | 1 (04.0)                    | 1 (02.1)                    |
| Bone fracture (n, %)              | 1 (04.6)                       | 0 (00.0)                    | 1 (02.1)                    |
| Intergluteal cleft fissure (n, %) | 1 (04.6)                       | 0 (00.0)                    | 1 (02.1)                    |
| Hypokalemia (n, %)                | 1 (04.6)                       | 0 (00.0)                    | 1 (02.1)                    |
| Perineal mycosis (n, %)           | 1 (04.6)                       | 0 (00.0)                    | 1 (02.1)                    |
| Spasticity (n, %)                 | 1 (04.6)                       | 0 (00.0)                    | 1 (02.1)                    |
| Deep vein thrombosis (n, %)       | 0 (00.0)                       | 1 (04.0)                    | 1 (02.1)                    |

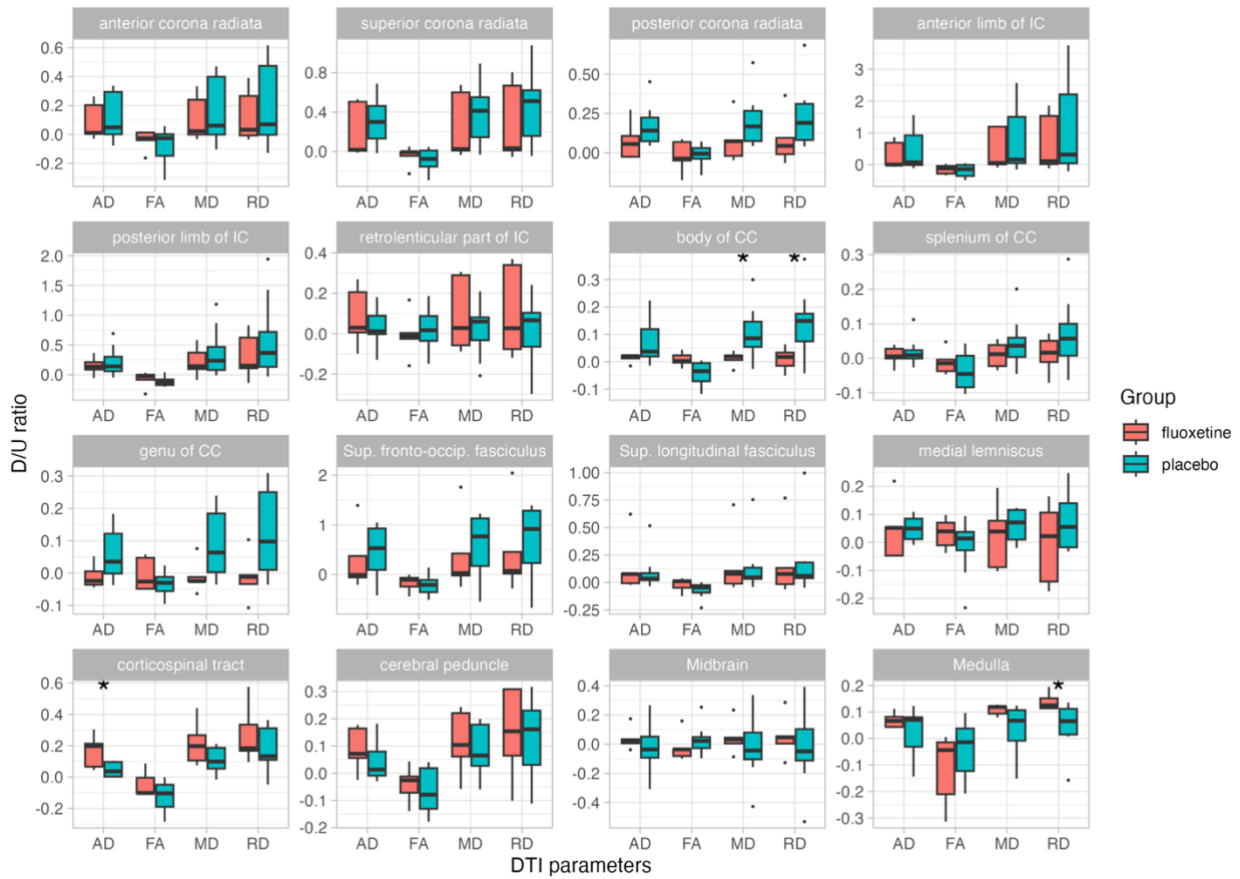

**Supplementary Fig. 3 Median Damaged/Undamaged (D/U) ratio derived from DTI analysis at Day 90 versus Day 0**

IC = internal capsule; CC = corpus callosum.  $*P < 0.05$
